# Supplementary material for: Prognostic Value of Gamma-Glutamyltransferase in Male Patients With Idiopathic Pulmonary Arterial Hypertension
Source: PubMed Central journal article supplement (PMC7644547; doi:10.3389/fcvm.2020.580908), 2020-10-23
Supplement: Data_Sheet_1.pdf [file Data_Sheet_1.pdf]

## Supplementary Information

### Influence of Gamma-glutamyltransferase on Idiopathic Pulmonary Arterial Hypertension in Male Patients

Gang-Hua Lu<sup>1†</sup>, Su-Gang Gong<sup>2†</sup>, Chao Li<sup>1</sup>, Qin-Hua Zhao<sup>2</sup>, Rong Jiang<sup>2</sup>, Ci-Jun  
Luo<sup>2</sup>, Lan Wang<sup>1,2,\*</sup>, Rui Zhang<sup>1,2,\*</sup>

<sup>1</sup>Tongji University School of Medicine, Shanghai, 200092, China;

<sup>2</sup>Department of Cardio-Pulmonary Circulation, Shanghai Pulmonary Hospital,  
Tongji University School of Medicine, Shanghai, 200433, China;

#### **\*Co-correspondence:**

Dr. Rui Zhang, MD, E-mail: [zgr1219@163.com](mailto:zgr1219@163.com);

and Dr. Lan Wang, MD, E-mail: [wanglan198212@163.com](mailto:wanglan198212@163.com);

Department of Cardio-Pulmonary Circulation, Shanghai Pulmonary Hospital,  
Tongji University School of Medicine, No. 507 Zhengmin Road, Shanghai, 200433,  
China; Telephone: +86-21-65115006; Fax: +86-21-55662767;

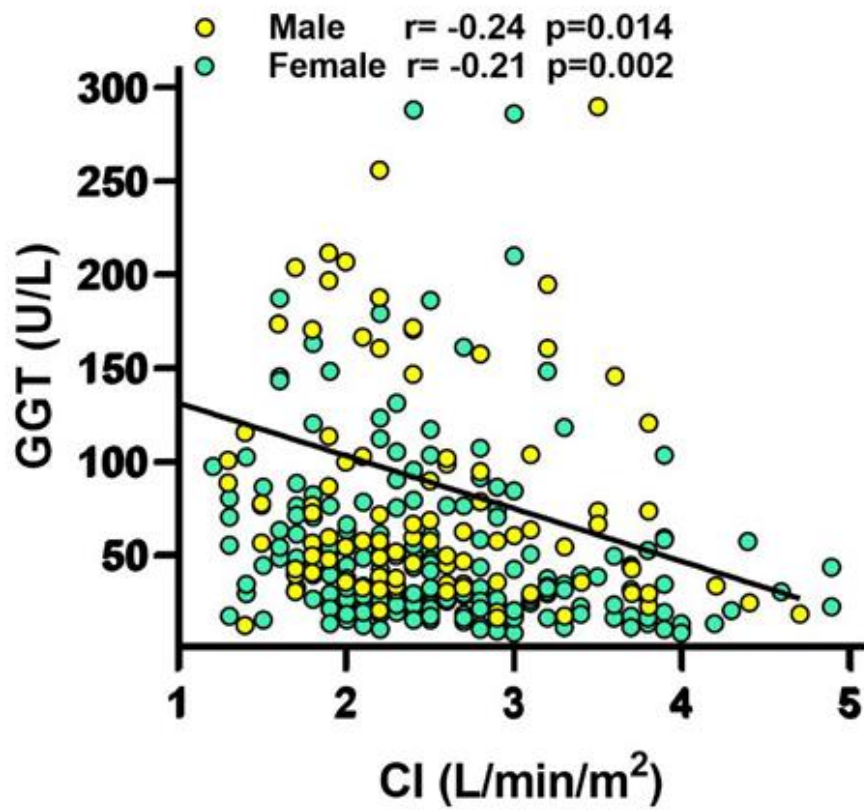

**Supplemental Figure 1.** Correlation between serum GGT activity and CI ( $r = -0.24$ ,  $p = 0.014$  in male;  $r = -0.21$ ,  $p = 0.002$  in female).

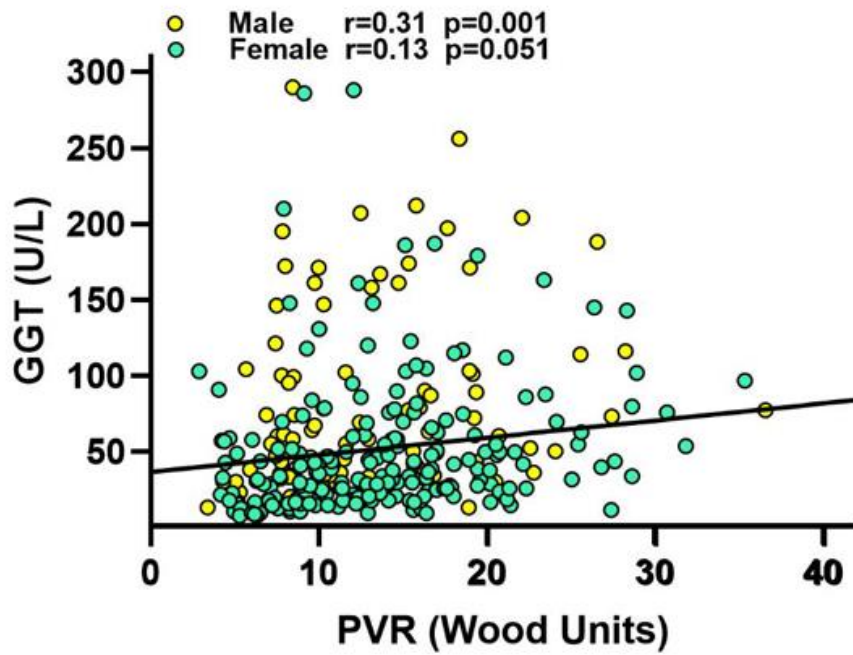

**Supplemental Figure 2.** Correlation between serum GGT activity and PVR ( $r = 0.31$ ,  $p = 0.001$  in male;  $r = 0.13$ ,  $p = 0.051$  in female).

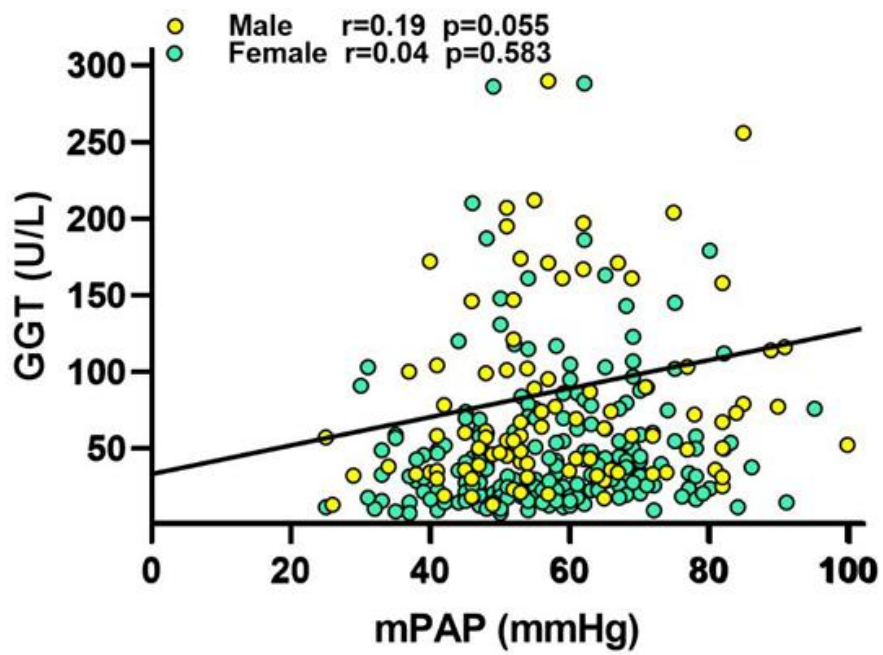

**Supplemental Figure 3.** Correlation between serum GGT activity and mPAP ( $r = 0.19$ ,  $p = 0.055$  in male;  $r = 0.04$ ,  $p = 0.583$  in female).

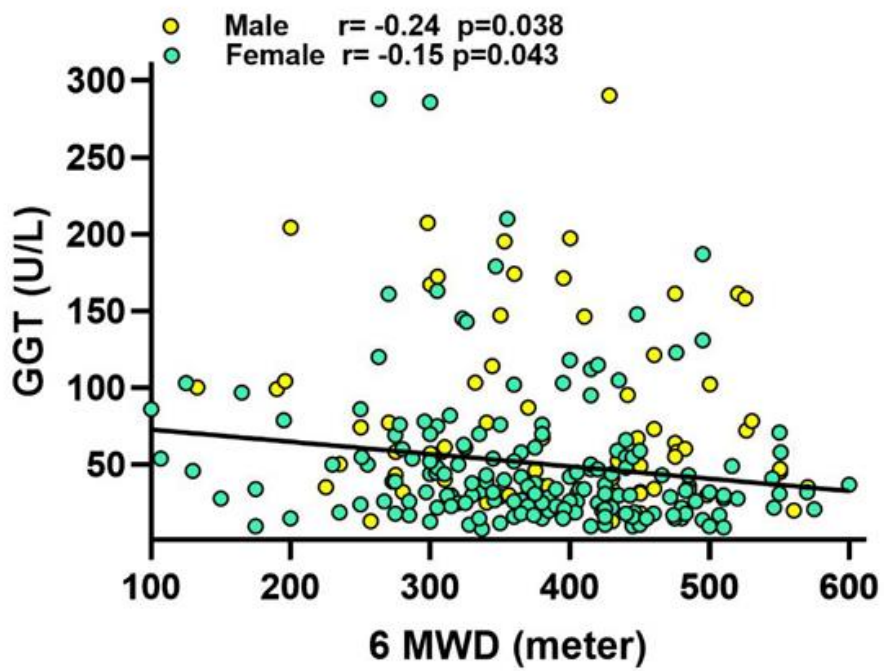

**Supplemental Figure 4.** Correlation between serum GGT activity and 6MWD ( $r = -0.24$ ,  $p = 0.038$  in male;  $r = -0.15$ ,  $p = 0.043$  in female).

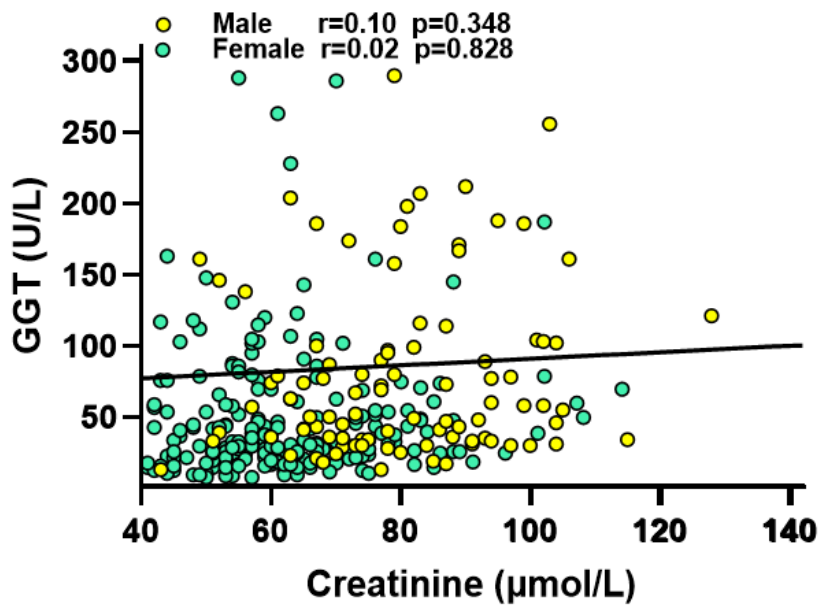

**Supplemental Figure 5.** Correlation between serum GGT activity and Creatinine

( $r = 0.10$ ,  $p = 0.348$  in male;  $r = 0.02$ ,  $p = 0.828$  in female).

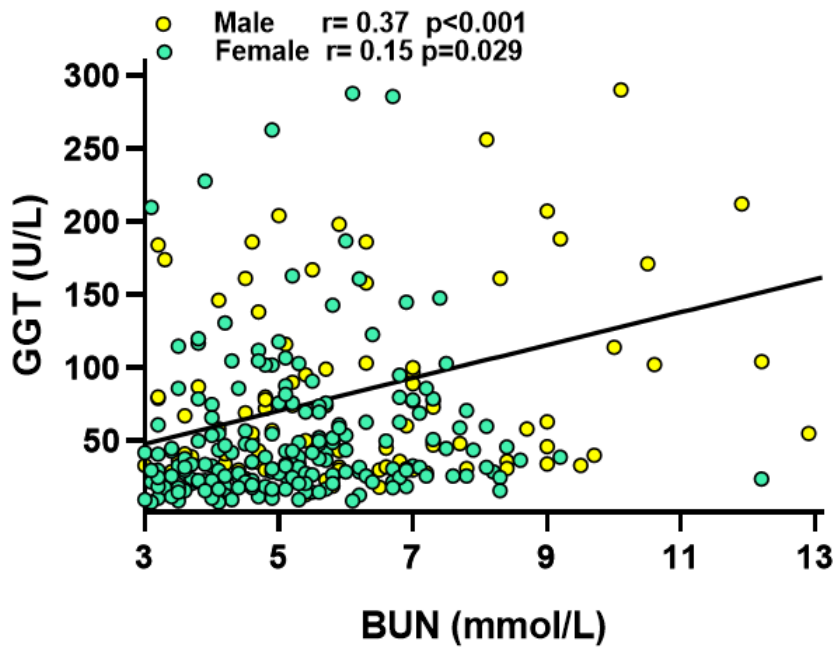

**Supplemental Figure 6.** Correlation between serum GGT activity and BUN ( $r = 0.37$ ,  $p < 0.001$  in male;  $r = 0.15$ ,  $p = 0.029$  in female).

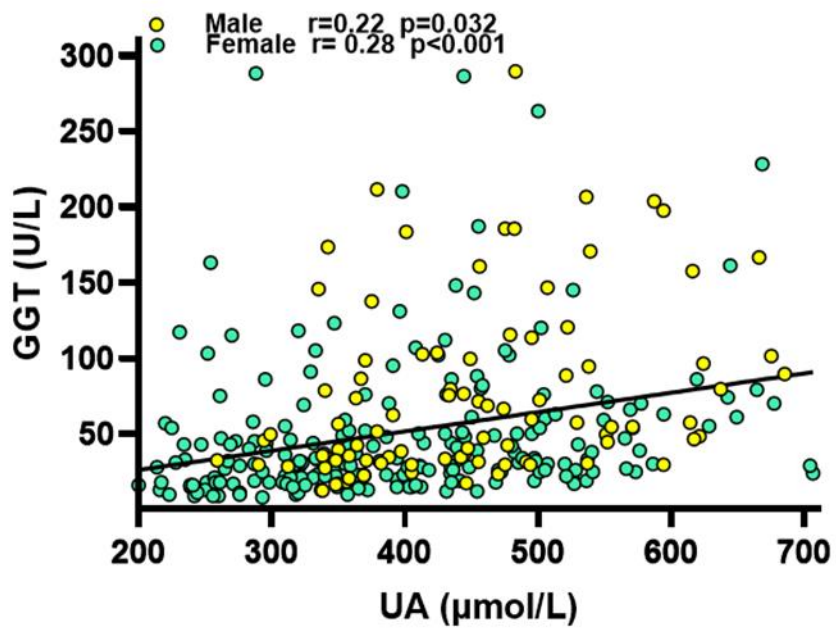

**Supplemental Figure 7.** Correlation between serum GGT activity and UA ( $r = 0.22$ ,  $p = 0.032$  in male;  $r = 0.28$ ,  $p < 0.001$  in female).



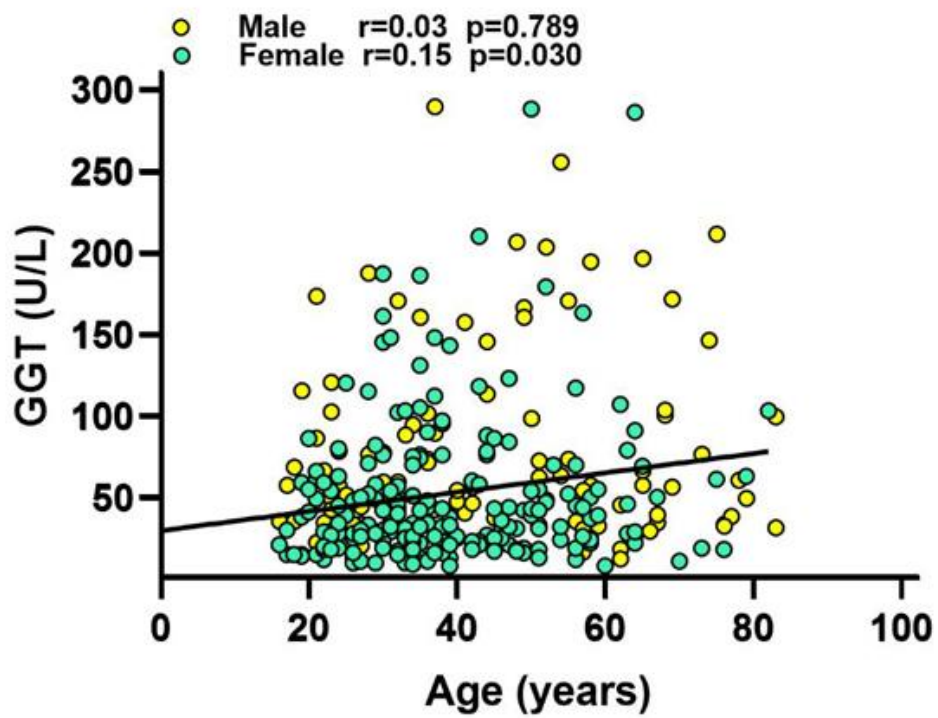

**Supplemental Figure 8.** Correlation between serum GGT activity and Age ( $r = 0.03$ ,  $p = 0.789$  in male;  $r = 0.15$ ,  $p = 0.030$  in female).

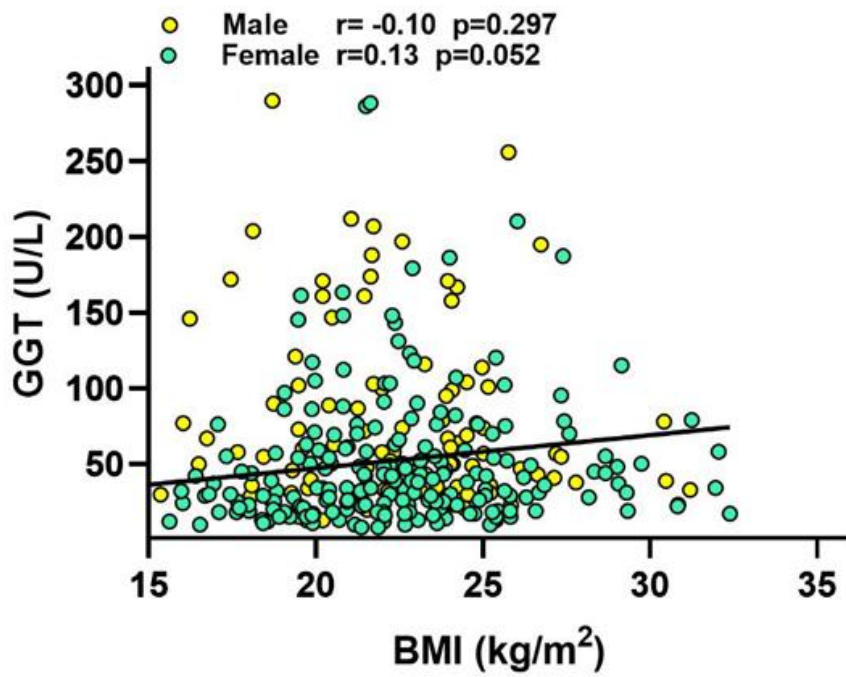

**Supplemental Figure 9** Correlation between serum GGT activity and BMI ( $r = -0.10$ ,  $p = 0.297$  in male;  $r = 0.13$ ,  $p = 0.052$  in female).

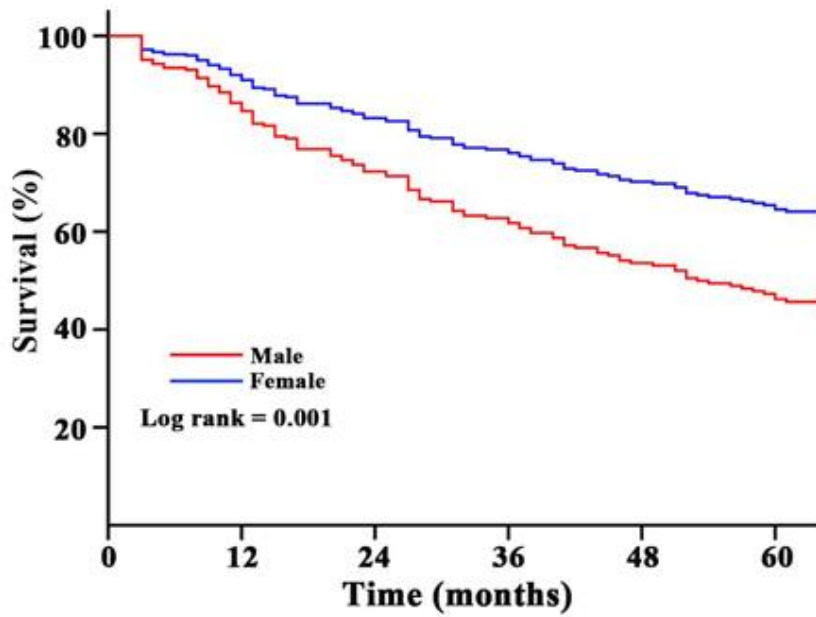

|        | Number of IPAH patients at risk<br>(death or transplantation in %) |         |          |          |          |         |
|--------|--------------------------------------------------------------------|---------|----------|----------|----------|---------|
| Male   | 105 (0)                                                            | 83 (17) | 65 (27)  | 48 (36)  | 40 (43)  | 32 (48) |
| Female | 233 (0)                                                            | 190 (8) | 159 (16) | 131 (21) | 117 (25) | 95 (29) |

**Supplemental Figure 10.** Kaplan-Meier survival curves according to the different gender.
